# Supplementary material for: HIV Infection is associated with compositional and functional shifts in the rectal mucosal microbiota
Source: Springer Nature journal article supplement (doi:10.1186/2049-2618-1-26), 2013-10-12

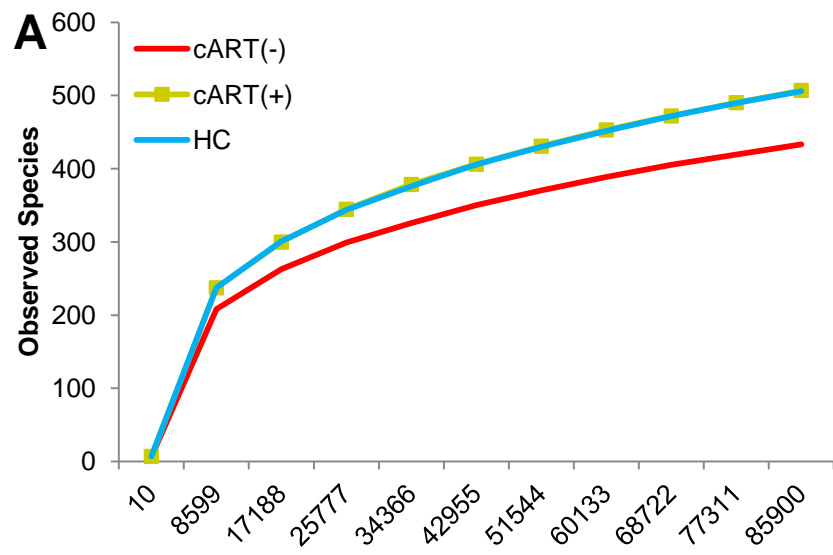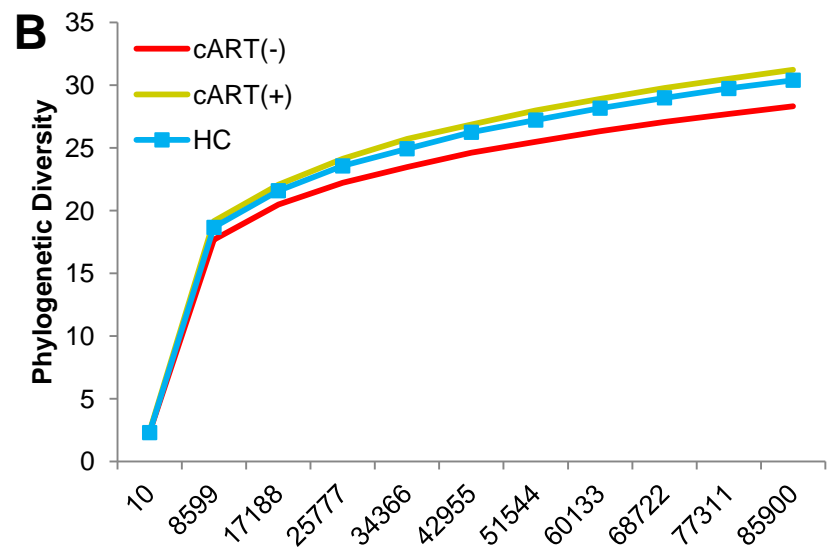

Supplement: 40168_2013_26_MOESM3_ESM.pdf [file 40168_2013_26_MOESM3_ESM.pdf]
